# Supplementary material for: Keratin 15 protects against cigarette smoke-induced epithelial mesenchymal transformation by MMP-9
Source: Springer Nature journal article supplement (doi:10.1186/s12931-023-02598-w), 2023-11-25
Supplement: MOESM1 [file 26356600]

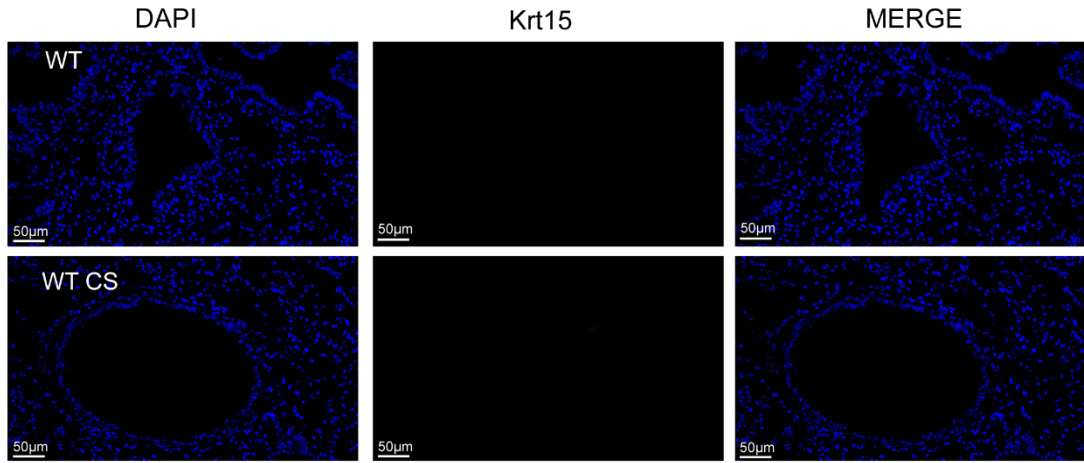

**Figure S1:** Krt15<sup>+</sup> cells did not show autofluorescence. WT, wild-type; WT CS, wild-type + CS exposure of 60 days.
